# Supplementary material for: Effects of Distance and Neighbor Size on Abies hickelii: The Asymmetric Competition Is Aggravated in an Endangered Species
Source: MDPI journal article supplement (doi:10.3390/f14081654), 2023-08-16
Supplement: s1 [file s1]

# Effect of Distance and Neighbor Size on *Abies hickelii*: The Asymmetric Competition Is Aggravated in an Endangered Species.

## Supplementary Materials

**Table S1.** Regression coefficients and fit indicators obtained when evaluating the joint effect of horizontal relative size and vertical relative size on the variables of interest.

| Variable assessed | Combined effect of                        | Standardized coefficients | SE   | T-value | P-value | R2     |
|-------------------|-------------------------------------------|---------------------------|------|---------|---------|--------|
| DBH               | The relative horizontal and mean distance | -0.61                     | 0.18 | -3.49   | 0.0010  | 0.1811 |
| TH                | The relative horizontal and mean distance | -0.53                     | 0.18 | -2.97   | 0.0044  | 0.1383 |
| DBH               | The relative vertical and mean distance   | -0.40                     | 0.17 | -2.43   | 0.0184  | 0.0969 |
| TH                | The relative vertical and mean distance   | -0.35                     | 0.17 | -2.07   | 0.0436  | 0.0719 |

**Table S2.** Cohen's index values (d) and their respective 95% confidence intervals.

| Competitor's position | Variable assessed | Cohen's d | Lower limit of d | Upper limit of d |
|-----------------------|-------------------|-----------|------------------|------------------|
| Neighbor 1*           | DBH               | 0.44      | -0.13            | 1.01             |
|                       | TH                | 0.58      | 0.01             | 1.15             |
| Neighbor 2*           | DBH               | 0.11      | -0.43            | 0.66             |
|                       | TH                | 0.16      | -0.39            | 0.70             |
| Neighbor 3            | DBH               | -0.06     | -0.63            | 0.51             |
|                       | TH                | -0.03     | -0.60            | 0.55             |
| Neighbor 4*           | DBH               | 0.22      | -0.35            | 0.78             |
|                       | TH                | 0.28      | -0.28            | 0.85             |
| Neighbor 5*           | DBH               | 1.05      | 0.37             | 1.73             |
|                       | TH                | 1.01      | 0.33             | 1.68             |

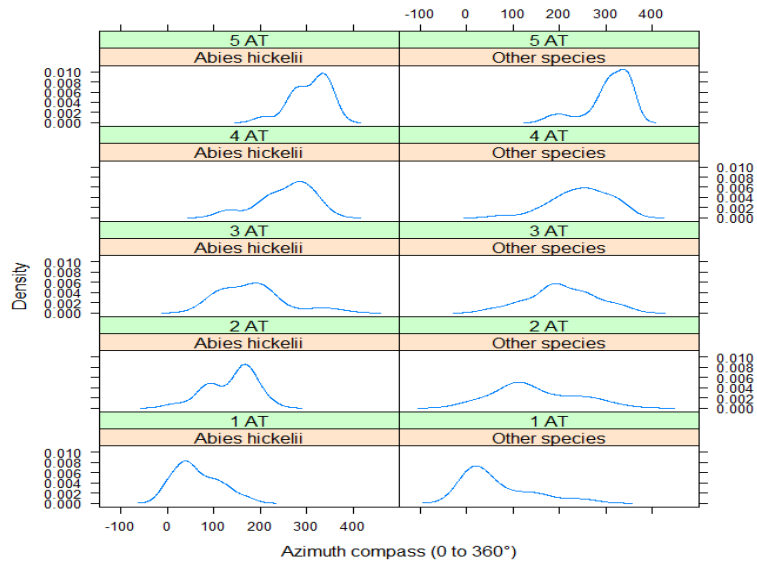

**Figure S1.** Density curves of the distribution of the first five neighbors of *A. hickelii* with respect to azimuth.

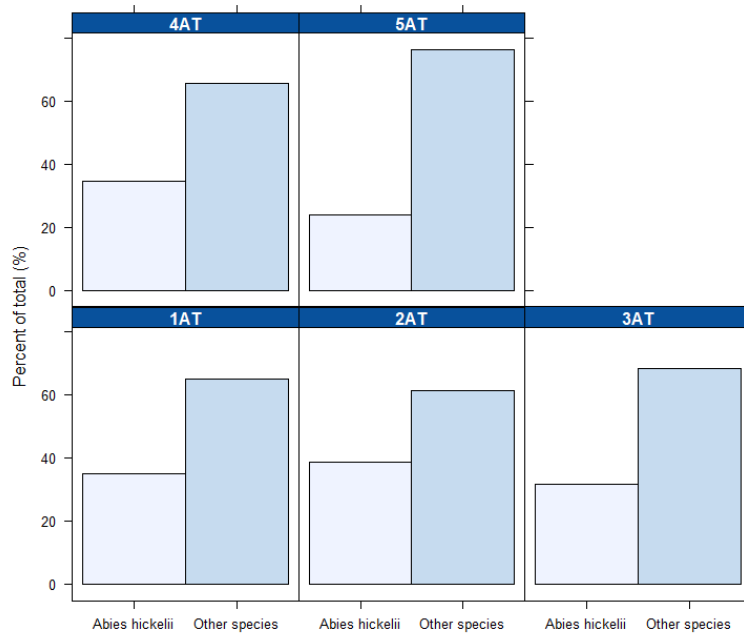

**Figure S2.** The frequency (%) of the first five neighbors of *A. hickelii* with a diameter greater than or equal to 7.5 cm. The locations occupied by the neighbors are denoted as 1AT, 2AT, 3AT, 4AT and 5AT, indicating the first, second, third, fourth and fifth positions, respectively.

## Raw data before any filtering

| id1        | id-tree | dist   | azimut | dn    | h    | sppvecino      |
|------------|---------|--------|--------|-------|------|----------------|
| 10-C-uno   | AR      |        |        | 15.87 | 12   | Abies hickelii |
| 10-C-uno   | 4AT     | 3.1    | 27     | 11.4  | 11.4 | Abies hickelii |
| 10-C-uno   | 5AT     | 3.14   | 150    | 18.79 | 13   | Other species  |
| 10-C-uno   | 1AT     | 2.15   | 178    | 22.6  | 13   | Other species  |
| 10-C-uno   | 2AT     | 2.35   | 313    | 23.62 | 14   | Other species  |
| 10-C-uno   | 3AT     | 2.5    | 335    | 14.22 | 12   | Other species  |
| 10-C-dos   | AR      |        |        | 9.14  | 10   | Abies hickelii |
| 10-C-dos   | 4AT     | 3.6    | 82     | 23.36 | 14   | Other species  |
| 10-C-dos   | 3AT     | 2.3    | 275    | 10.03 | 9    | Other species  |
| 10-C-dos   | 2AT     | 1.7501 | 312    | 10.16 | 11   | Abies hickelii |
| 10-C-dos   | 1AT     | 1.75   | 336    | 10.16 | 11.3 | Abies hickelii |
| 10-C-dos   | 5AT     | 4      | 357    | 8.12  | 7.5  | Other species  |
| 10-120-uno | AR      |        |        | 8.68  | 11.5 | Abies hickelii |
| 10-120-uno | 1AT     | 1.15   | 12     | 8     | 9.5  | Other species  |
| 10-120-uno | 4AT     | 4.2    | 135    | 66.04 | 35.4 | Other species  |
| 10-120-uno | 3AT     | 3.25   | 196    | 8.12  | 10   | Abies hickelii |
| 10-120-uno | 2AT     | 1.7    | 205    | 7.74  | 10.5 | Abies hickelii |
| 10-120-uno | 5AT     | 5.5    | 211    | 11.43 | 8    | Other species  |
| 10-120-dos | AR      |        |        | 7.62  | 9    | Abies hickelii |
| 10-120-dos | 4AT     | 3.45   | 24     | 75.94 | 40.4 | Other species  |
| 10-120-dos | 2AT     | 3.15   | 96     | 11.93 | 8.5  | Other species  |
| 10-120-dos | 5AT     | 4.4    | 156    | 48    | 27.4 | Other species  |
| 10-120-dos | 1AT     | 2.3    | 169    | 41.52 | 35.4 | Other species  |
| 10-120-dos | 3AT     | 3.3    | 272    | 7.74  | 9    | Abies hickelii |
| 9-C-uno    | AR      |        |        | 12.95 | 13   | Abies hickelii |
| 9-C-uno    | 3AT     | 4.2    | 262    | 9.14  | 10   | Other species  |
| 9-C-uno    | 4AT     | 4.6    | 272    | 24.63 | 17   | Other species  |
| 9-C-uno    | 2AT     | 2.95   | 330    | 52.57 | 33   | Other species  |
| 9-C-uno    | 5AT     | 4.8    | 346    | 7.62  | 9    | Other species  |
| 9-C-uno    | 1AT     | 1.3    | 354    | 8.89  | 10   | Abies hickelii |
| 9-C-dos    | AR      |        |        | 8.89  | 10   | Abies hickelii |
| 9-C-dos    | 1AT     | 1.25   | 170    | 12.95 | 13   | Abies hickelii |
| 9-C-dos    | 4AT     | 4.4    | 246    | 9.14  | 10   | Other species  |
| 9-C-dos    | 5AT     | 4.45   | 267    | 24.63 | 17   | Other species  |
| 9-C-dos    | 2AT     | 1.8    | 320    | 52.57 | 33   | Other species  |
| 9-C-dos    | 3AT     | 2.7    | 343    | 7.62  | 9    | Other species  |
| 9-120-uno  | AR      |        |        | 60.32 | 39.5 | Abies hickelii |
| 9-120-uno  | 4AT     | 5.5    | 45     | 8.12  | 8.5  | Abies hickelii |
| 9-120-uno  | 2AT     | 3.8    | 66     | 78.23 | 37   | Other species  |
| 9-120-uno  | 5AT     | 5.5    | 90     | 10.16 | 8.5  | Abies hickelii |

|           |     |      |     |       |      |                |
|-----------|-----|------|-----|-------|------|----------------|
| 9-120-uno | 1AT | 3.15 | 317 | 58.03 | 42.2 | Abies hickelii |
| 9-120-uno | 3AT | 5.3  | 317 | 19.55 | 9.4  | Other species  |
| 9-120-dos | AR  |      |     | 7.87  | 6    | Abies hickelii |
| 9-120-dos | 1AT | 2.9  | 104 | 24.89 | 17   | Other species  |
| 9-120-dos | 2AT | 3.5  | 215 | 10.16 | 8.5  | Abies hickelii |
| 9-120-dos | 3AT | 3.7  | 246 | 78.23 | 37   | Other species  |
| 9-120-dos | 4AT | 3.75 | 275 | 8.12  | 8.5  | Abies hickelii |
| 9-120-dos | 5AT | 4.5  | 303 | 12.95 | 9    | Other species  |
| 9-240-uno | AR  |      |     | 50.54 | 28.4 | Abies hickelii |
| 9-240-uno | 5AT | 3.85 | 85  | 12.19 | 13   | Abies hickelii |
| 9-240-uno | 4AT | 3.68 | 91  | 7.62  | 7.4  | Abies hickelii |
| 9-240-uno | 2AT | 1.15 | 116 | 7.62  | 9.5  | Abies hickelii |
| 9-240-uno | 1AT | 0.65 | 198 | 17.27 | 15   | Other species  |
| 9-240-uno | 3AT | 2.4  | 353 | 10.71 | 9    | Other species  |
| 9-240-dos | AR  |      |     | 7.62  | 7.4  | Abies hickelii |
| 9-240-dos | 3AT | 2.6  | 7   | 14.5  | 10   | Other species  |
| 9-240-dos | 1AT | 0.4  | 18  | 12.19 | 13   | Abies hickelii |
| 9-240-dos | 5AT | 4.3  | 252 | 17.27 | 15   | Other species  |
| 9-240-dos | 2AT | 2.6  | 257 | 7.62  | 9.5  | Abies hickelii |
| 9-240-dos | 4AT | 3.65 | 263 | 50.54 | 28.4 | Abies hickelii |
| 8-C-uno   | AR  |      |     | 26.03 | 21.5 | Abies hickelii |
| 8-C-uno   | 5AT | 5.55 | 19  | 81.91 | 41.4 | Other species  |
| 8-C-uno   | 3AT | 4.82 | 93  | 9.9   | 7.5  | Other species  |
| 8-C-uno   | 1AT | 4.4  | 123 | 9.9   | 8.5  | Abies hickelii |
| 8-C-uno   | 2AT | 4.65 | 256 | 56.26 | 28   | Other species  |
| 8-C-uno   | 4AT | 5.5  | 276 | 12.19 | 13.5 | Abies hickelii |
| 8-C-dos   | AR  |      |     | 9.9   | 8.5  | Abies hickelii |
| 8-C-dos   | 1AT | 2.62 | 28  | 10.03 | 7.5  | Other species  |
| 8-C-dos   | 4AT | 6.2  | 175 | 16.51 | 8    | Other species  |
| 8-C-dos   | 5AT | 6.35 | 195 | 24.25 | 16   | Other species  |
| 8-C-dos   | 3AT | 5.57 | 230 | 9.14  | 7    | Other species  |
| 8-C-dos   | 2AT | 4.35 | 303 | 26.03 | 21.5 | Abies hickelii |
| 8-N-uno   | AR  |      |     | 20.32 | 16.5 | Abies hickelii |
| 8-N-uno   | 3AT | 2.1  | 161 | 11.17 | 5.5  | Other species  |
| 8-N-uno   | 5AT | 6.55 | 242 | 16    | 9    | Other species  |
| 8-N-uno   | 4AT | 5.85 | 256 | 13.97 | 6    | Other species  |
| 8-N-uno   | 2AT | 2    | 289 | 19.55 | 20   | Other species  |
| 8-N-uno   | 1AT | 1.9  | 309 | 34.03 | 20   | Other species  |
| 8-N-dos   | AR  |      |     | 10.41 | 7.5  | Abies hickelii |
| 8-N-dos   | 2AT | 4.7  | 114 | 13.71 | 9    | Other species  |
| 8-N-dos   | 3AT | 5.3  | 130 | 62.35 | 32.4 | Other species  |
| 8-N-dos   | 1AT | 3.1  | 196 | 72.13 | 36   | Other species  |
| 8-240-uno | AR  |      |     | 42.92 | 21   | Abies hickelii |

|           |     |      |     |       |      |                |
|-----------|-----|------|-----|-------|------|----------------|
| 8-240-uno | 3AT | 5.35 | 148 | 45.97 | 37.1 | Other species  |
| 8-240-uno | 1AT | 2.95 | 200 | 36.32 | 17.5 | Abies hickelii |
| 8-240-uno | 2AT | 3.15 | 230 | 13.97 | 7    | Other species  |
| 8-240-dos | AR  |      |     | 12.19 | 8.4  | Abies hickelii |
| 8-240-dos | 4AT | 6.6  | 17  | 45.97 | 37.1 | Other species  |
| 8-240-dos | 2AT | 3.8  | 49  | 14.35 | 5    | Other species  |
| 8-240-dos | 1AT | 3.6  | 105 | 63.37 | 36.2 | Other species  |
| 8-240-dos | 5AT | 7    | 133 | 49.78 | 35.4 | Other species  |
| 8-240-dos | 3AT | 4.2  | 196 | 29.97 | 25   | Other species  |
| 7-C-uno   | AR  |      |     | 20.57 | 22.5 | Abies hickelii |
| 7-C-uno   | 3AT | 2.79 | 53  | 15.11 | 12   | Other species  |
| 7-C-uno   | 1AT | 1.9  | 117 | 11.93 | 9    | Other species  |
| 7-C-uno   | 4AT | 4.1  | 118 | 15.49 | 17.5 | Abies hickelii |
| 7-C-uno   | 5AT | 5.46 | 272 | 81.28 | 43   | Other species  |
| 7-C-uno   | 2AT | 2.7  | 351 | 13.2  | 11.5 | Other species  |
| C-7-dos   | AR  |      |     | 11.43 | 9.5  | Abies hickelii |
| C-7-dos   | 5AT | 3.55 | 36  | 10.41 | 8    | Other species  |
| C-7-dos   | 3AT | 2.5  | 73  | 7.87  | 8.5  | Other species  |
| C-7-dos   | 4AT | 2.5  | 172 | 9.39  | 11   | Other species  |
| C-7-dos   | 1AT | 1.41 | 259 | 88.39 | 46   | Other species  |
| C-7-dos   | 2AT | 2.23 | 345 | 13.97 | 15   | Abies hickelii |
| 7-N-uno   | AR  |      |     | 9.22  | 7    | Abies hickelii |
| 7-N-uno   | 2AT | 3    | 0   | 9.77  | 7    | Other species  |
| 7-N-uno   | 1AT | 1.25 | 20  | 12.82 | 13.5 | Other species  |
| 7-N-uno   | 5AT | 4.5  | 108 | 11.17 | 9    | Other species  |
| 7-N-uno   | 4AT | 4.35 | 203 | 13.33 | 9.5  | Other species  |
| 7-N-uno   | 3AT | 3.22 | 292 | 10.41 | 8    | Other species  |
| 7-120-uno | AR  |      |     | 34.41 | 14.5 | Abies hickelii |
| 7-120-uno | 1AT | 4.9  | 152 | 45.97 | 23   | Other species  |
| 7-120-uno | 4AT | 7.15 | 245 | 19.43 | 9.5  | Other species  |
| 7-120-uno | 2AT | 5    | 250 | 42.16 | 20.5 | Other species  |
| 7-120-uno | 5AT | 7.2  | 264 | 8.12  | 6    | Other species  |
| 7-120-uno | 3AT | 6.8  | 321 | 46.48 | 26.5 | Other species  |
| 7-240-uno | AR  |      |     | 52.07 | 26   | Abies hickelii |
| 7-240-uno | 2AT | 2.3  | 50  | 12.95 | 7.5  | Other species  |
| 7-240-uno | 5AT | 2.73 | 205 | 8.63  | 10   | Other species  |
| 7-240-uno | 3AT | 2.45 | 245 | 19.55 | 18.5 | Other species  |
| 7-240-uno | 4AT | 2.5  | 288 | 32.89 | 15.5 | Other species  |
| 7-240-uno | 1AT | 1.65 | 348 | 7.62  | 8    | Other species  |
| 7-240-dos | AR  |      |     | 17.01 | 14   | Abies hickelii |
| 7-240-dos | 4AT | 3.55 | 0   | 12.19 | 8    | Other species  |
| 7-240-dos | 3AT | 2.95 | 5   | 7.62  | 8    | Other species  |
| 7-240-dos | 5AT | 4.8  | 47  | 19.55 | 18.5 | Other species  |

|           |     |      |     |       |      |                |
|-----------|-----|------|-----|-------|------|----------------|
| 7-240-dos | 1AT | 1.7  | 238 | 10.28 | 14   | Other species  |
| 7-240-dos | 2AT | 2.51 | 243 | 57.91 | 25   | Other species  |
| 6-C-uno   | AR  |      |     | 10.66 | 7.5  | Abies hickelii |
| 6-C-uno   | 2AT | 2.4  | 1   | 20.06 | 17.5 | Other species  |
| 6-C-uno   | 1AT | 1.95 | 1   | 37.84 | 19   | Other species  |
| 6-C-uno   | 3AT | 3.6  | 64  | 24.63 | 19   | Other species  |
| 6-C-uno   | 4AT | 3.64 | 74  | 13.71 | 13   | Other species  |
| 6-C-uno   | 5AT | 3.9  | 270 | 20.06 | 17   | Other species  |
| 6-120-uno | AR  |      |     | 14.47 | 11.5 | Abies hickelii |
| 6-120-uno | 4AT | 5.2  | 142 | 9.77  | 7    | Other species  |
| 6-120-uno | 2AT | 3.55 | 184 | 72.64 | 26   | Other species  |
| 6-120-uno | 3AT | 3.6  | 192 | 44.83 | 25   | Other species  |
| 6-120-uno | 1AT | 2.44 | 307 | 42.41 | 26.5 | Other species  |
| 5-C-uno   | AR  |      |     | 14.47 | 14   | Abies hickelii |
| 5-C-uno   | 1AT | 2.3  | 30  | 50.03 | 25.5 | Other species  |
| 5-C-uno   | 5AT | 5.75 | 88  | 11.3  | 9.5  | Other species  |
| 5-C-uno   | 3AT | 4.9  | 228 | 56.38 | 28   | Other species  |
| 5-C-uno   | 2AT | 3.2  | 245 | 25.4  | 14   | Other species  |
| 5-C-uno   | 4AT | 4.86 | 309 | 58.67 | 26.5 | Other species  |
| 5-N-uno   | AR  |      |     | 28.06 | 19   | Abies hickelii |
| 5-N-uno   | 5AT | 4.65 | 221 | 11.93 | 10.5 | Other species  |
| 5-N-uno   | 3AT | 3.35 | 224 | 17.78 | 14   | Other species  |
| 5-N-uno   | 2AT | 1.71 | 311 | 11.68 | 9.5  | Other species  |
| 5-N-uno   | 1AT | 1.6  | 327 | 18.54 | 14   | Other species  |
| 5-N-uno   | 4AT | 3.7  | 328 | 9.14  | 8    | Other species  |
| 4-C-uno   | AR  |      |     | 55.11 | 38   | Abies hickelii |
| 4-C-uno   | 1AT | 1.41 | 91  | 9.27  | 9.5  | Abies hickelii |
| 4-C-uno   | 5AT | 2.65 | 170 | 9.14  | 8.5  | Abies hickelii |
| 4-C-uno   | 4AT | 2.3  | 183 | 8.5   | 8.5  | Abies hickelii |
| 4-C-uno   | 3AT | 2.1  | 230 | 44.7  | 27   | Other species  |
| 4-C-uno   | 2AT | 2    | 282 | 10.66 | 10   | Abies hickelii |
| 4-C-dos   | AR  |      |     | 7.5   | 10   | Abies hickelii |
| 4-C-dos   | 5AT | 3.5  | 35  | 9.39  | 8.5  | Abies hickelii |
| 4-C-dos   | 2AT | 2    | 172 | 10.41 | 10   | Abies hickelii |
| 4-C-dos   | 4AT | 2.6  | 189 | 9.9   | 9    | Abies hickelii |
| 4-C-dos   | 3AT | 2.15 | 296 | 8.38  | 9.5  | Abies hickelii |
| 4-C-dos   | 1AT | 1.35 | 327 | 7.87  | 9.5  | Abies hickelii |
| 4-120-uno | AR  |      |     | 75.05 | 42.5 | Abies hickelii |
| 4-120-uno | 1AT | 1.4  | 19  | 1.66  | 7.5  | Abies hickelii |
| 4-120-uno | 2AT | 2.15 | 62  | 8.5   | 6    | Abies hickelii |
| 4-120-uno | 5AT | 4.8  | 99  | 11.48 | 10   | Abies hickelii |
| 4-120-uno | 3AT | 2.5  | 115 | 9.9   | 6.5  | Abies hickelii |
| 4-120-uno | 4AT | 2.85 | 292 | 9.14  | 7    | Other species  |

|           |     |      |     |       |      |                |
|-----------|-----|------|-----|-------|------|----------------|
| 4-120-dos | AR  |      |     | 7.87  | 7    | Abies hickelii |
| 4-120-dos | 3AT | 4.55 | 102 | 10.66 | 7.5  | Abies hickelii |
| 4-120-dos | 2AT | 4.2  | 118 | 75.05 | 42.5 | Abies hickelii |
| 4-120-dos | 1AT | 2.35 | 163 | 9.14  | 7    | Abies hickelii |
| 4-240-uno | AR  |      |     | 44.95 | 25   | Abies hickelii |
| 4-240-uno | 3AT | 4.6  | 115 | 13.2  | 10.5 | Abies hickelii |
| 4-240-uno | 5AT | 5.1  | 118 | 55.88 | 34   | Other species  |
| 4-240-uno | 2AT | 4.2  | 121 | 57.4  | 26   | Other species  |
| 4-240-uno | 4AT | 4.85 | 168 | 51.3  | 25.5 | Other species  |
| 4-240-uno | 1AT | 2.3  | 314 | 12.57 | 5.6  | Other species  |
| 4-240-dos | AR  |      |     | 8.12  | 8.5  | Abies hickelii |
| 4-240-dos | 2AT | 2.42 | 1   | 17.9  | 15   | Abies hickelii |
| 4-240-dos | 4AT | 2.75 | 78  | 17.9  | 13   | Abies hickelii |
| 4-240-dos | 5AT | 3    | 106 | 80.51 | 25   | Other species  |
| 4-240-dos | 1AT | 0.2  | 125 | 14.6  | 13.5 | Abies hickelii |
| 4-240-dos | 3AT | 2.45 | 206 | 13.33 | 10.5 | Abies hickelii |
| 3-C-uno   | AR  |      |     | 30.22 | 20   | Abies hickelii |
| 3-C-uno   | 3AT | 4.8  | 115 | 21.33 | 17   | Other species  |
| 3-C-uno   | 2AT | 3.8  | 165 | 17.78 | 16   | Abies hickelii |
| 3-C-uno   | 1AT | 3.63 | 198 | 37.84 | 27   | Other species  |
| 3-C-uno   | 4AT | 6.65 | 216 | 10.41 | 11   | Other species  |
| 3-C-uno   | 5AT | 6.9  | 280 | 48    | 29   | Other species  |
| 3-C-dos   | AR  |      |     | 8.25  | 8.5  | Abies hickelii |
| 3-C-dos   | 5AT | 4.39 | 2   | 57.4  | 30   | Other species  |
| 3-C-dos   | 2AT | 1.94 | 33  | 25.4  | 12   | Other species  |
| 3-C-dos   | 3AT | 2.25 | 195 | 53.08 | 28   | Other species  |
| 3-C-dos   | 4AT | 3.15 | 277 | 18.03 | 15   | Abies hickelii |
| 3-C-dos   | 1AT | 1.21 | 347 | 9.14  | 7    | Abies hickelii |
| 3-N-uno   | AR  |      |     | 61.97 | 37.5 | Abies hickelii |
| 3-N-uno   | 2AT | 2.62 | 134 | 9.39  | 7    | Abies hickelii |
| 3-N-uno   | 5AT | 4.5  | 149 | 11.93 | 8.5  | Abies hickelii |
| 3-N-uno   | 3AT | 3.5  | 167 | 10.41 | 9.5  | Abies hickelii |
| 3-N-uno   | 1AT | 2.53 | 220 | 9.65  | 9    | Abies hickelii |
| 3-N-uno   | 4AT | 4.3  | 278 | 13.97 | 10.5 | Abies hickelii |
| 3-N-dos   | AR  |      |     | 7.62  | 9    | Abies hickelii |
| 3-N-dos   | 4AT | 1.93 | 3   | 17.78 | 13.5 | Abies hickelii |
| 3-N-dos   | 2AT | 1.7  | 162 | 15.49 | 13   | Abies hickelii |
| 3-N-dos   | 3AT | 1.56 | 214 | 9.14  | 8.5  | Abies hickelii |
| 3-N-dos   | 1AT | 1.26 | 267 | 49.4  | 35   | Other species  |
| 3-N-dos   | 5AT | 2.26 | 336 | 8.5   | 10.5 | Abies hickelii |
| 3-120-uno | AR  |      |     | 7.62  | 9    | Abies hickelii |
| 3-120-uno | 4AT | 1.93 | 3   | 17.78 | 13.5 | Abies hickelii |
| 3-120-uno | 3AT | 1.7  | 162 | 15.49 | 13   | Abies hickelii |

|           |     |      |     |       |      |                |
|-----------|-----|------|-----|-------|------|----------------|
| 3-120-uno | 2AT | 1.56 | 214 | 9.14  | 8.5  | Abies hickelii |
| 3-120-uno | 1AT | 1.26 | 267 | 49.4  | 35   | Other species  |
| 3-120-uno | 5AT | 2.26 | 336 | 8.5   | 10.5 | Abies hickelii |
| 3-120-dos | AR  |      |     | 8.35  | 7.5  | Abies hickelii |
| 3-120-dos | 1AT | 1.75 | 5   | 34.54 | 30   | Other species  |
| 3-120-dos | 3AT | 3.45 | 87  | 11.93 | 15   | Abies hickelii |
| 3-120-dos | 2AT | 3.3  | 198 | 19.05 | 18   | Other species  |
| 3-120-dos | 5AT | 4.33 | 209 | 37.33 | 20   | Other species  |
| 3-120-dos | 4AT | 4.25 | 337 | 44.7  | 25   | Other species  |
| 3-240-uno | AR  |      |     | 8.35  | 7.5  | Abies hickelii |
| 3-240-uno | 1AT | 1.75 | 5   | 34.54 | 30   | Other species  |
| 3-240-uno | 2AT | 3.45 | 87  | 11.93 | 15   | Abies hickelii |
| 3-240-uno | 3AT | 3.3  | 198 | 19.05 | 18   | Other species  |
| 3-240-uno | 5AT | 4.33 | 209 | 37.33 | 20   | Other species  |
| 3-240-uno | 4AT | 4.25 | 337 | 44.7  | 25   | Other species  |
| 3-240-dos | AR  |      |     | 8.38  | 8.5  | Abies hickelii |
| 3-240-dos | 1AT | 1.43 | 122 | 12.44 | 9.5  | Abies hickelii |
| 3-240-dos | 4AT | 2.8  | 136 | 14.47 | 10.5 | Other species  |
| 3-240-dos | 3AT | 1.93 | 223 | 9.52  | 8    | Abies hickelii |
| 3-240-dos | 5AT | 3.65 | 278 | 8.5   | 5.5  | Other species  |
| 3-240-dos | 2AT | 1.82 | 314 | 7.62  | 5.5  | Other species  |
| 2-C-uno   | AR  |      |     | 32.51 | 24   | Abies hickelii |
| 2-C-uno   | 1AT | 1.6  | 62  | 8.76  | 4.4  | Other species  |
| 2-C-uno   | 2AT | 2.5  | 163 | 14.17 | 17   | Abies hickelii |
| 2-C-uno   | 4AT | 4.75 | 299 | 14.17 | 9.5  | Other species  |
| 2-C-uno   | 3AT | 4.6  | 316 | 21.08 | 7    | Other species  |
| 2-C-dos   | AR  |      |     | 10.41 | 12.5 | Abies hickelii |
| 2-C-dos   | 1AT | 1.8  | 55  | 16.25 | 15.5 | Abies hickelii |
| 2-C-dos   | 3AT | 2.12 | 96  | 13.71 | 14   | Abies hickelii |
| 2-C-dos   | 5AT | 5.12 | 174 | 10.41 | 10.5 | Other species  |
| 2-C-dos   | 4AT | 4.46 | 226 | 31.75 | 25.5 | Other species  |
| 2-C-dos   | 2AT | 1.91 | 345 | 45.08 | 33.6 | Other species  |
| 2-N-uno   | AR  |      |     | 54.1  | 40   | Abies hickelii |
| 2-N-uno   | 4AT | 5.2  | 10  | 33.52 | 12   | Other species  |
| 2-N-uno   | 3AT | 2.8  | 95  | 9.39  | 7.5  | Other species  |
| 2-N-uno   | 1AT | 0.8  | 112 | 29.46 | 20.5 | Abies hickelii |
| 2-N-uno   | 2AT | 2.65 | 320 | 13.2  | 12   | Abies hickelii |
| 2-N-dos   | AR  |      |     | 13.2  | 12   | Abies hickelii |
| 2-N-dos   | 3AT | 3.6  | 38  | 33.52 | 12   | Other species  |
| 2-N-dos   | 4AT | 5.2  | 116 | 9.39  | 7.5  | Other species  |
| 2-N-dos   | 2AT | 3.56 | 128 | 29.46 | 20.5 | Abies hickelii |
| 2-N-dos   | 1AT | 2.5  | 140 | 54.1  | 40   | Abies hickelii |
| 2-120-uno | AR  |      |     | 53.08 | 28   | Abies hickelii |



|           |     |      |     |       |      |                |
|-----------|-----|------|-----|-------|------|----------------|
| 2-120-uno | 5AT | 3.75 | 49  | 39.87 | 25   | Abies hickelii |
| 2-120-uno | 3AT | 3.35 | 169 | 37.59 | 24.5 | Abies hickelii |
| 2-120-uno | 2AT | 2.2  | 174 | 14.78 | 13.5 | Other species  |
| 2-120-uno | 4AT | 3.6  | 256 | 38.1  | 26   | Abies hickelii |
| 2-120-uno | 1AT | 0.96 | 356 | 14.35 | 14   | Other species  |
| 2-120-dos | AR  |      |     | 16.89 | 15.5 | Abies hickelii |
| 2-120-dos | 2AT | 4.47 | 46  | 14.73 | 12.5 | Other species  |
| 2-120-dos | 3AT | 5.95 | 292 | 63.75 | 34   | Other species  |
| 2-120-dos | 1AT | 4.32 | 358 | 34.72 | 20.5 | Abies hickelii |
| 2-240-uno | AR  |      |     | 24.89 | 16.7 | Abies hickelii |
| 2-240-uno | 1AT | 3.4  | 23  | 119.6 | 35   | Other species  |
| 2-240-uno | 3AT | 5.45 | 204 | 9.39  | 10   | Other species  |
| 2-240-uno | 2AT | 3.8  | 233 | 7.5   | 4.1  | Other species  |
| 2-240-uno | 4AT | 5.9  | 333 | 10.41 | 5.6  | Other species  |
| 2-240-dos | AR  |      |     | 7.5   | 4.45 | Abies hickelii |
| 2-240-dos | 3AT | 3.37 | 175 | 14.22 | 10   | Other species  |
| 2-240-dos | 1AT | 2.95 | 340 | 8.38  | 6.3  | Other species  |
| 2-240-dos | 2AT | 3    | 350 | 10.92 | 6.5  | Other species  |
| 1-C-uno   | AR  |      |     | 59.43 | 37   | Abies hickelii |
| 1-C-uno   | 1AT | 2.35 | 76  | 27.88 | 20.5 | Other species  |
| 1-C-uno   | 4AT | 3.6  | 123 | 10.41 | 7.5  | Other species  |
| 1-C-uno   | 5AT | 4.25 | 189 | 18.54 | 16   | Other species  |
| 1-C-uno   | 3AT | 3.4  | 206 | 22.6  | 20   | Abies hickelii |
| 1-C-uno   | 2AT | 2.75 | 298 | 13.46 | 16   | Abies hickelii |
| 1-C-dos   | AR  |      |     | 7.62  | 8    | Abies hickelii |
| 1-C-dos   | 3AT | 2.9  | 38  | 12.44 | 12   | Other species  |
| 1-C-dos   | 4AT | 3.3  | 105 | 7.82  | 9.5  | Abies hickelii |
| 1-C-dos   | 1AT | 0.74 | 269 | 10.1  | 11.5 | Other species  |
| 1-C-dos   | 5AT | 3.54 | 281 | 10.41 | 11.5 | Abies hickelii |
| 1-C-dos   | 2AT | 1.2  | 344 | 59.94 | 34.5 | Other species  |
| 1-N-uno   | AR  |      |     | 62.48 | 37   | Abies hickelii |
| 1-N-uno   | 1AT | 2.61 | 59  | 10.41 | 14   | Abies hickelii |
| 1-N-uno   | 4AT | 3.24 | 102 | 49.02 | 34   | Other species  |
| 1-N-uno   | 5AT | 3.31 | 210 | 32.63 | 31   | Abies hickelii |
| 1-N-uno   | 3AT | 3.17 | 257 | 8.38  | 8    | Other species  |
| 1-N-uno   | 2AT | 3    | 304 | 12.14 | 9.5  | Other species  |
| 1-N-dos   | AR  |      |     | 10.41 | 14   | Abies hickelii |
| 1-N-dos   | 1AT | 1.75 | 1   | 16.76 | 12   | Other species  |
| 1-N-dos   | 4AT | 3.3  | 106 | 10.92 | 11   | Other species  |
| 1-N-dos   | 2AT | 2.34 | 142 | 49.02 | 34   | Other species  |
| 1-N-dos   | 3AT | 2.6  | 228 | 62.48 | 37   | Abies hickelii |
| 1-N-dos   | 5AT | 3.97 | 294 | 62.73 | 36   | Other species  |
| 1-N-dos   | AR  |      |     | 10.41 | 14   | Abies hickelii |

|           |     |      |     |       |      |                |
|-----------|-----|------|-----|-------|------|----------------|
| 1-N-dos   | 1AT | 1.75 | 1   | 16.76 | 12   | Other species  |
| 1-N-dos   | 4AT | 3.3  | 106 | 10.92 | 11   | Other species  |
| 1-N-dos   | 2AT | 2.34 | 142 | 49.02 | 34   | Other species  |
| 1-N-dos   | 3AT | 2.6  | 228 | 62.48 | 37   | Abies hickelii |
| 1-N-dos   | 5AT | 3.97 | 294 | 62.73 | 36   | Other species  |
| 1-120-uno | AR  |      |     | 42.72 | 25.5 | Abies hickelii |
| 1-120-uno | 2AT | 3.55 | 22  | 9.77  | 9    | Other species  |
| 1-120-uno | 1AT | 2.37 | 108 | 11.45 | 12   | Other species  |
| 1-120-uno | 4AT | 4.81 | 117 | 25.9  | 21.5 | Abies hickelii |
| 1-120-uno | 5AT | 6    | 162 | 33.4  | 29   | Other species  |
| 1-120-uno | 3AT | 3.62 | 175 | 38.98 | 28   | Other species  |
| 1-120-dos | AR  |      |     | 10.41 | 14.5 | Abies hickelii |
| 1-120-dos | 4AT | 2.77 | 246 | 26.92 | 25.5 | Other species  |
| 1-120-dos | 5AT | 3.2  | 287 | 16.51 | 22.5 | Other species  |
| 1-120-dos | 3AT | 1.7  | 322 | 9.39  | 12.5 | Other species  |
| 1-120-dos | 1AT | 1.53 | 328 | 14.09 | 14.5 | Other species  |
| 1-120-dos | 2AT | 1.7  | 351 | 17.52 | 20.5 | Other species  |
| 1-240-uno | AR  |      |     | 39.57 | 29.5 | Abies hickelii |
| 1-240-uno | 1AT | 1.6  | 3   | 59.64 | 29.5 | Other species  |
| 1-240-uno | 2AT | 2.77 | 129 | 13.2  | 12   | Other species  |
| 1-240-uno | 3AT | 2.81 | 280 | 55.37 | 30   | Other species  |
| 1-240-uno | 4AT | 3.4  | 291 | 13.51 | 20   | Abies hickelii |
| 1-240-dos | AR  |      |     | 7.62  | 7.5  | Abies hickelii |
| 1-240-dos | 3AT | 3.36 | 91  | 10.16 | 11.5 | Abies hickelii |
| 1-240-dos | 1AT | 0.5  | 175 | 25.4  | 24   | Other species  |
| 1-240-dos | 4AT | 3.75 | 187 | 42.67 | 28.5 | Other species  |
| 1-240-dos | 5AT | 4.27 | 196 | 19.81 | 14.5 | Other species  |
| 1-240-dos | 2AT | 1.4  | 351 | 7.87  | 9    | Abies hickelii |
